# Supplementary material
Source: MDPI journal article supplement (https://www.mdpi.com/2071-1050/12/21/8975)
Supplement: s1 [file s1]

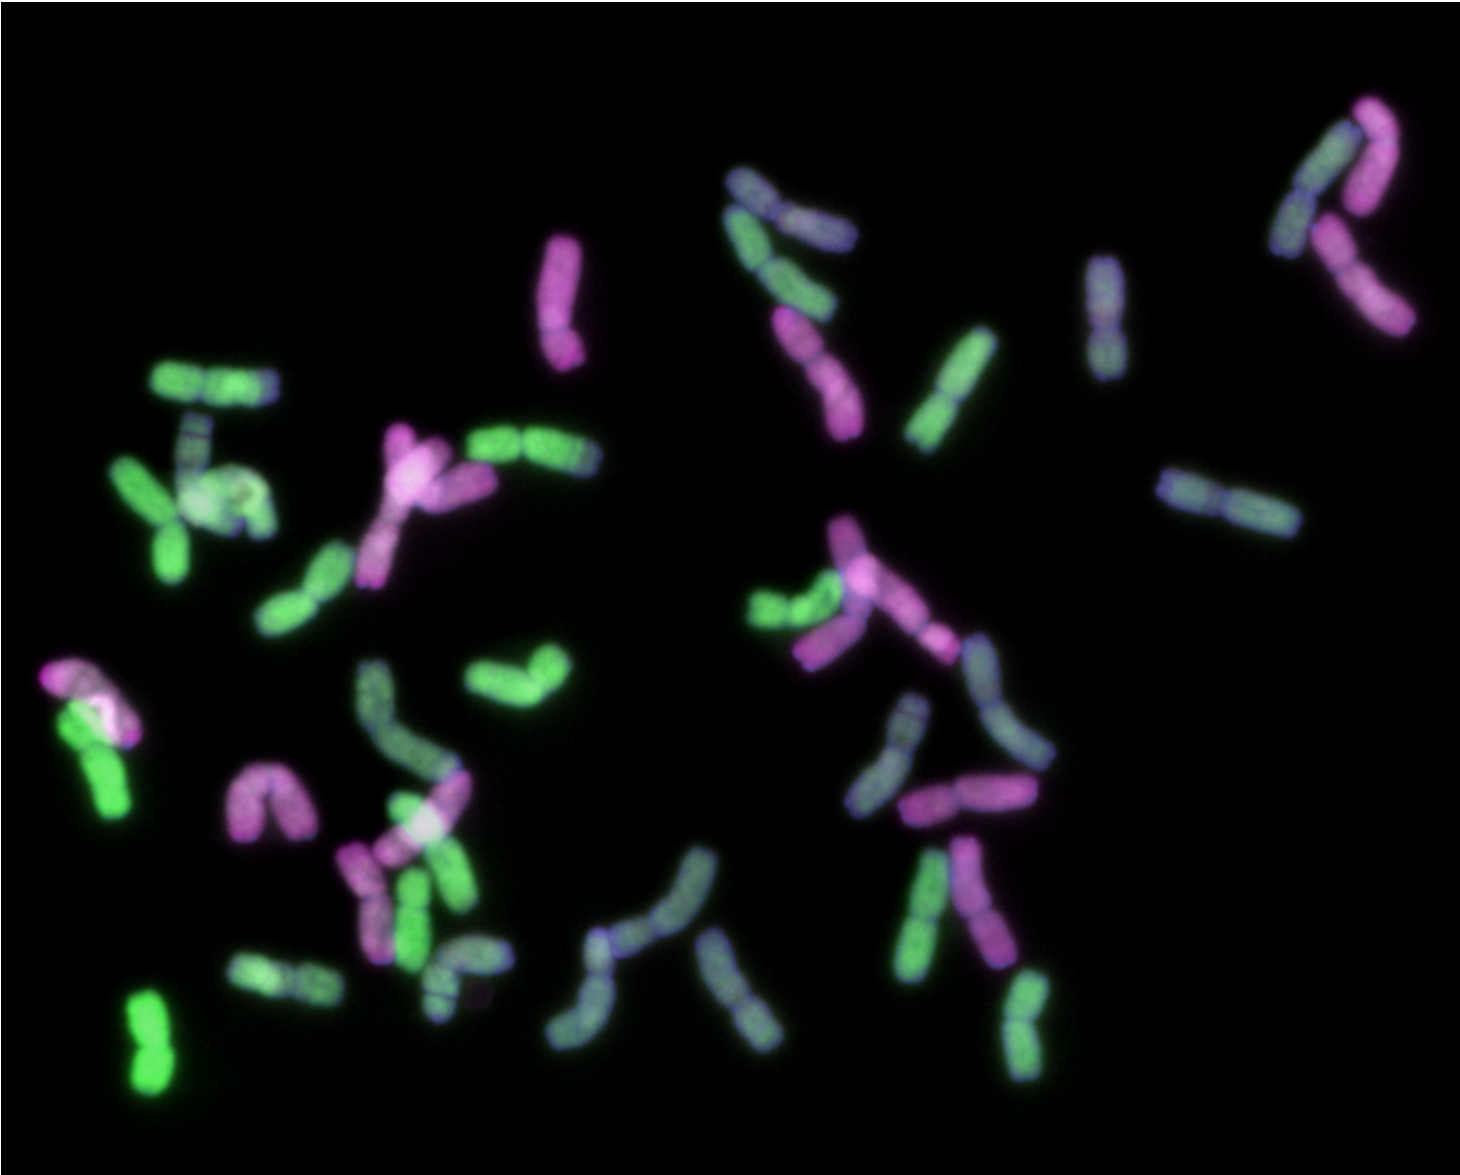

**EC 787007**

**Langdon x *Thinopyrum  
bessarabicum*** (Savul. &  
Rayss) Á. Löve (Poaceae)

**n = 42**

|              |                           |
|--------------|---------------------------|
| <b>Pink</b>  | = <i>Th. bessarabicum</i> |
| <b>Green</b> | = A genome                |
| <b>Grey</b>  | = B genome                |

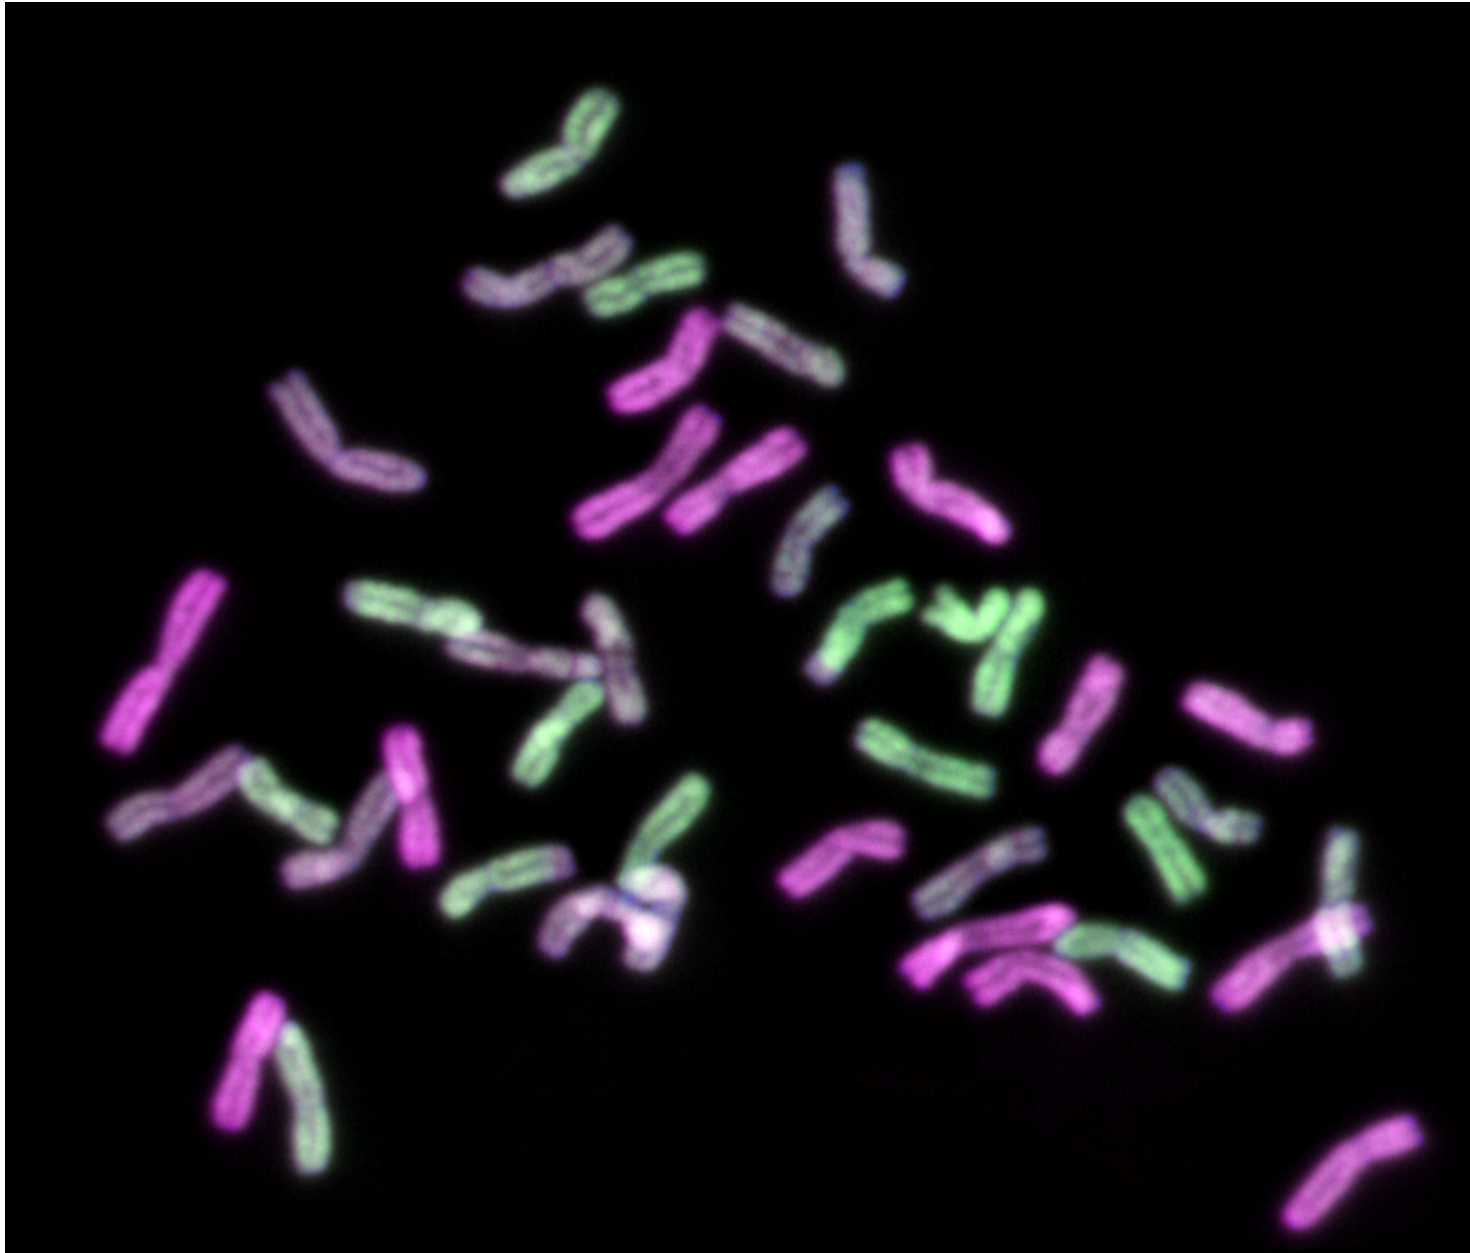

**EC 787008**

**Macoun x Thinopyrum  
bessarabicum**

**n = 42**

**Pink** = *Th. bessarabicum*

**Green** = A genome

**Grey** = B genome

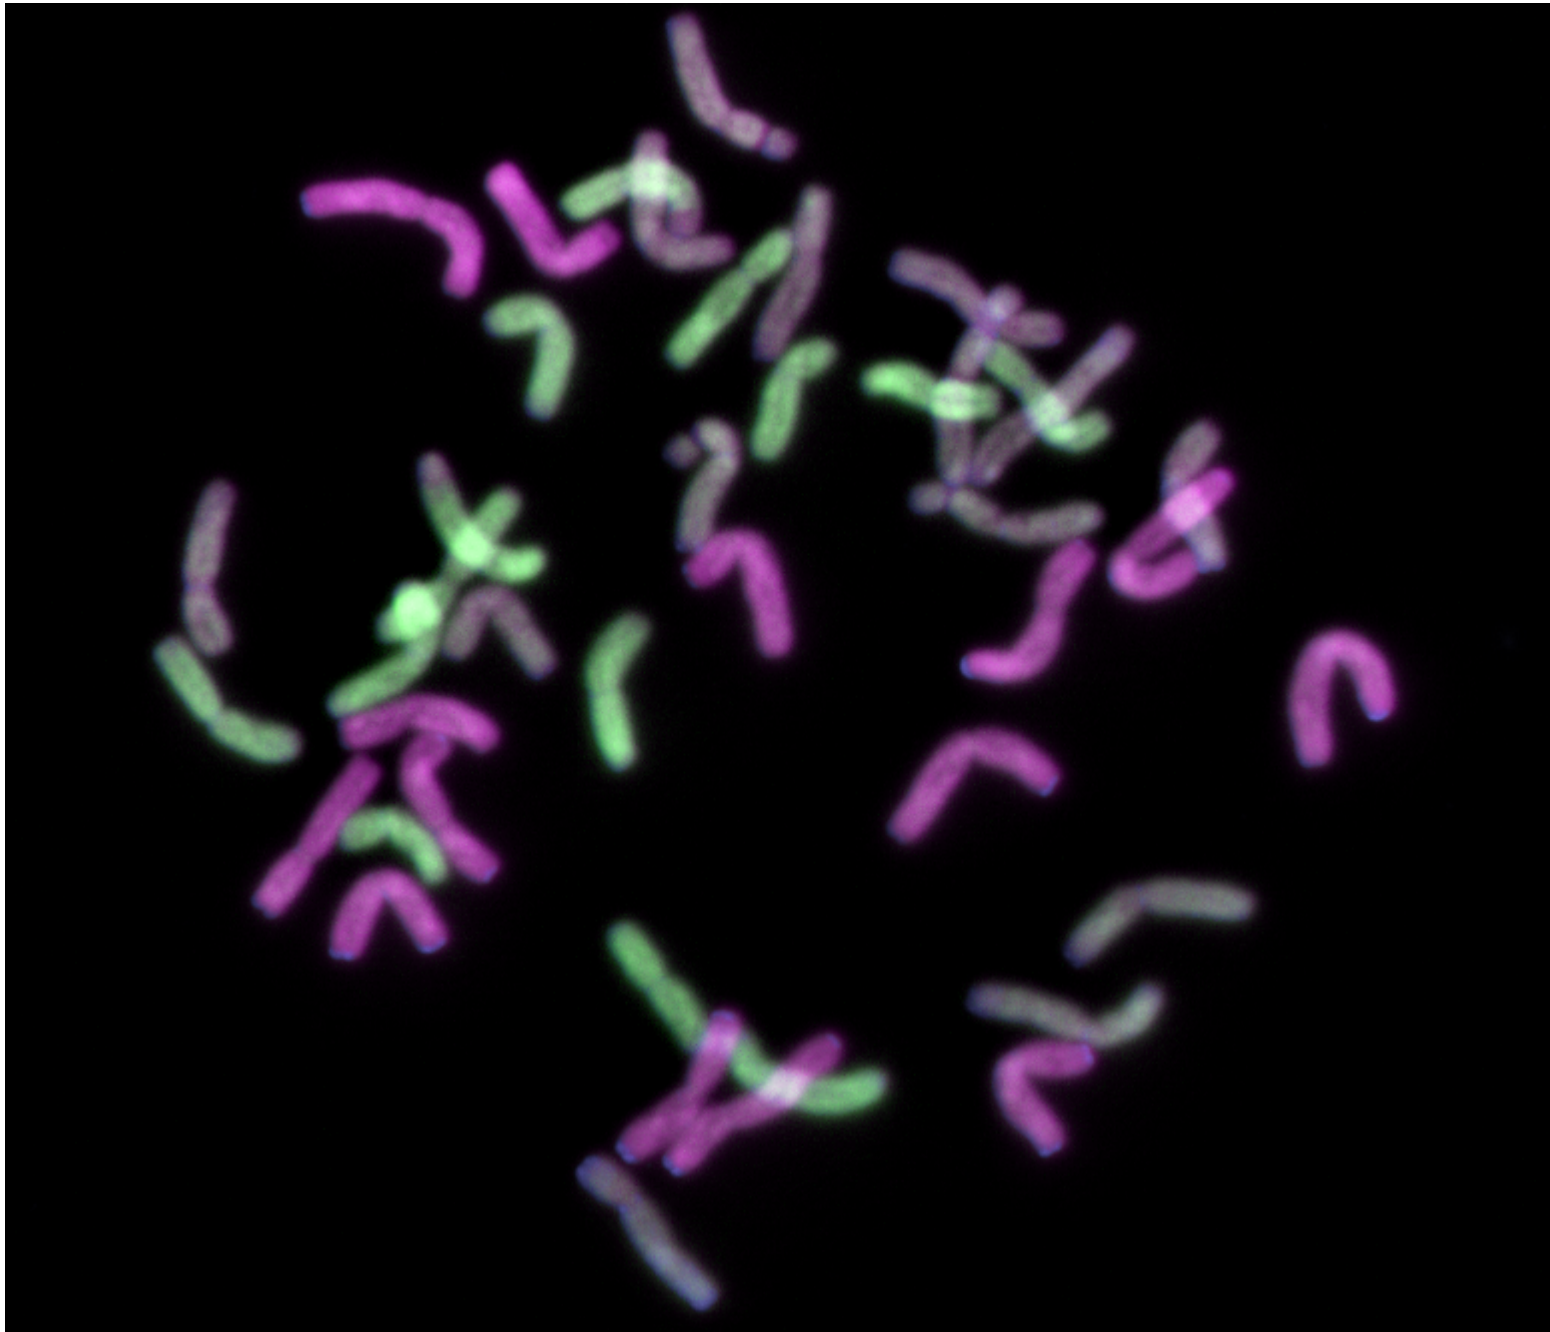

**EC 787009**

**Karim x Thinopyrum  
bessarabicum**

**n = 42**

|              |                           |
|--------------|---------------------------|
| <b>Pink</b>  | = <i>Th. bessarabicum</i> |
| <b>Green</b> | = A genome                |
| <b>Grey</b>  | = B genome                |

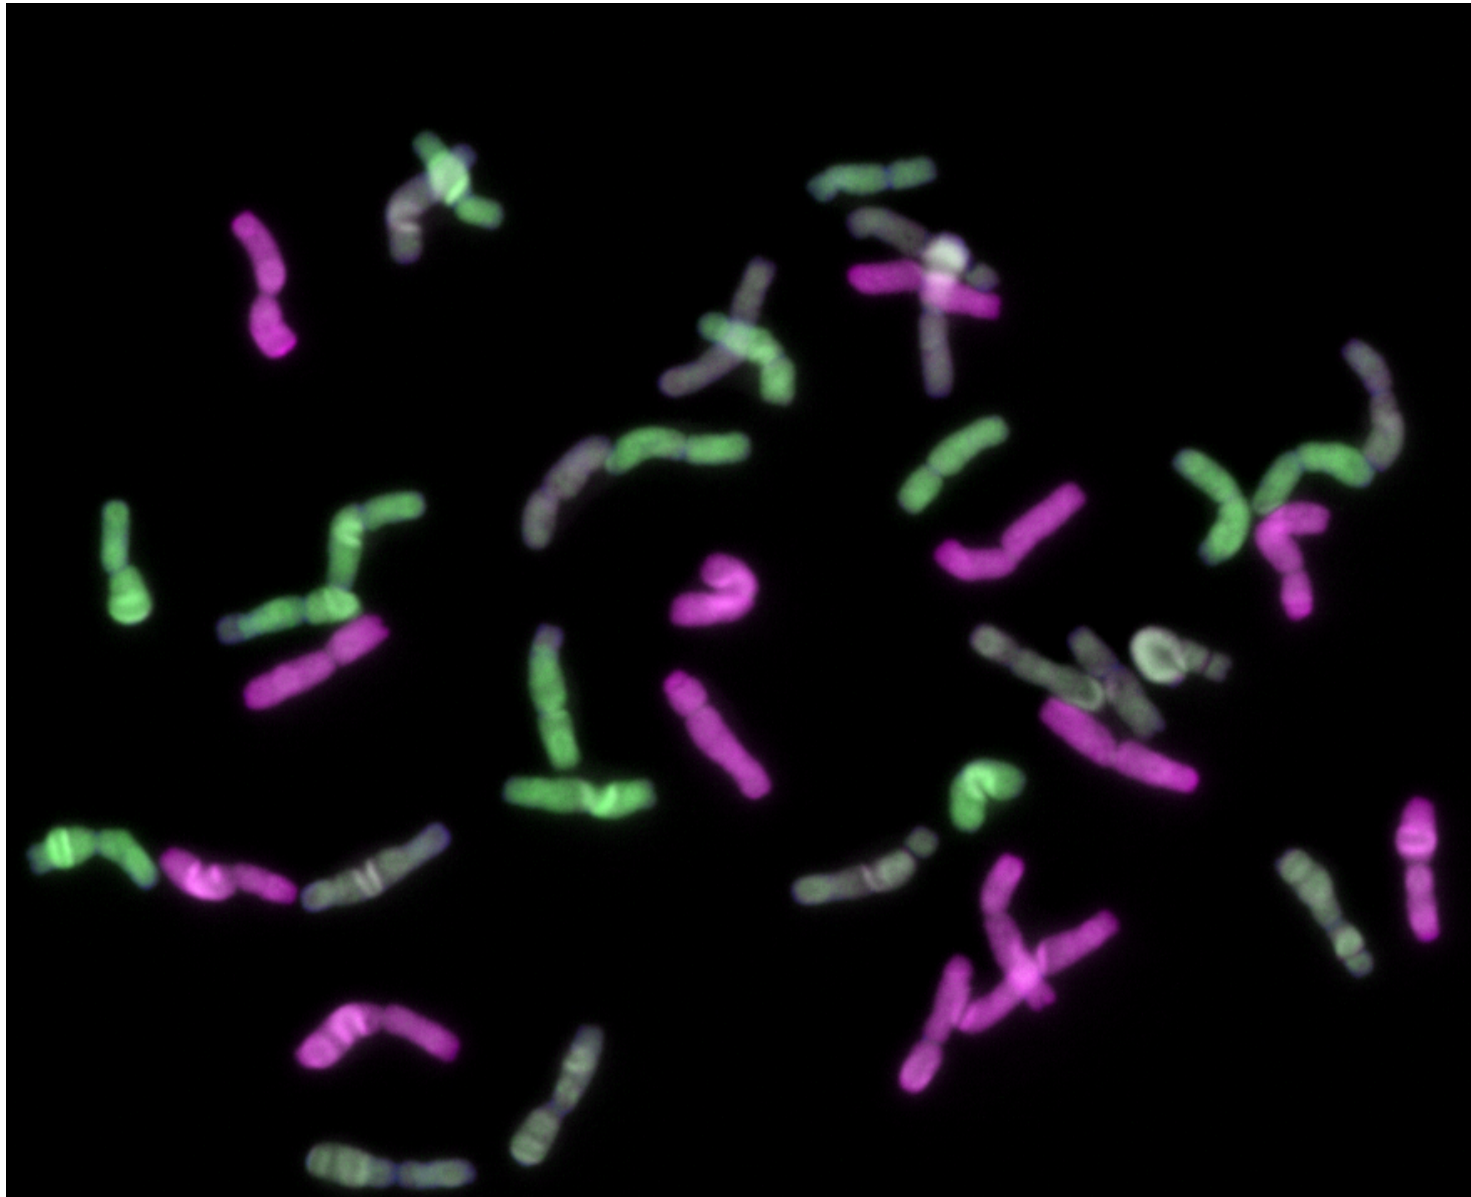

**EC 787010**

**Neodur x *Thinopyrum*  
*bessarabicum***

**n = 42**

**Pink** = *Th. bessarabicum*

**Green** = A genome

**Grey** = B genome



## EC 787011

Creso x *Thinopyrum bessarabicum*

n = 42

**Pink** = *Th. bessarabicum*

**Green** = A genome

**Grey** = B genome

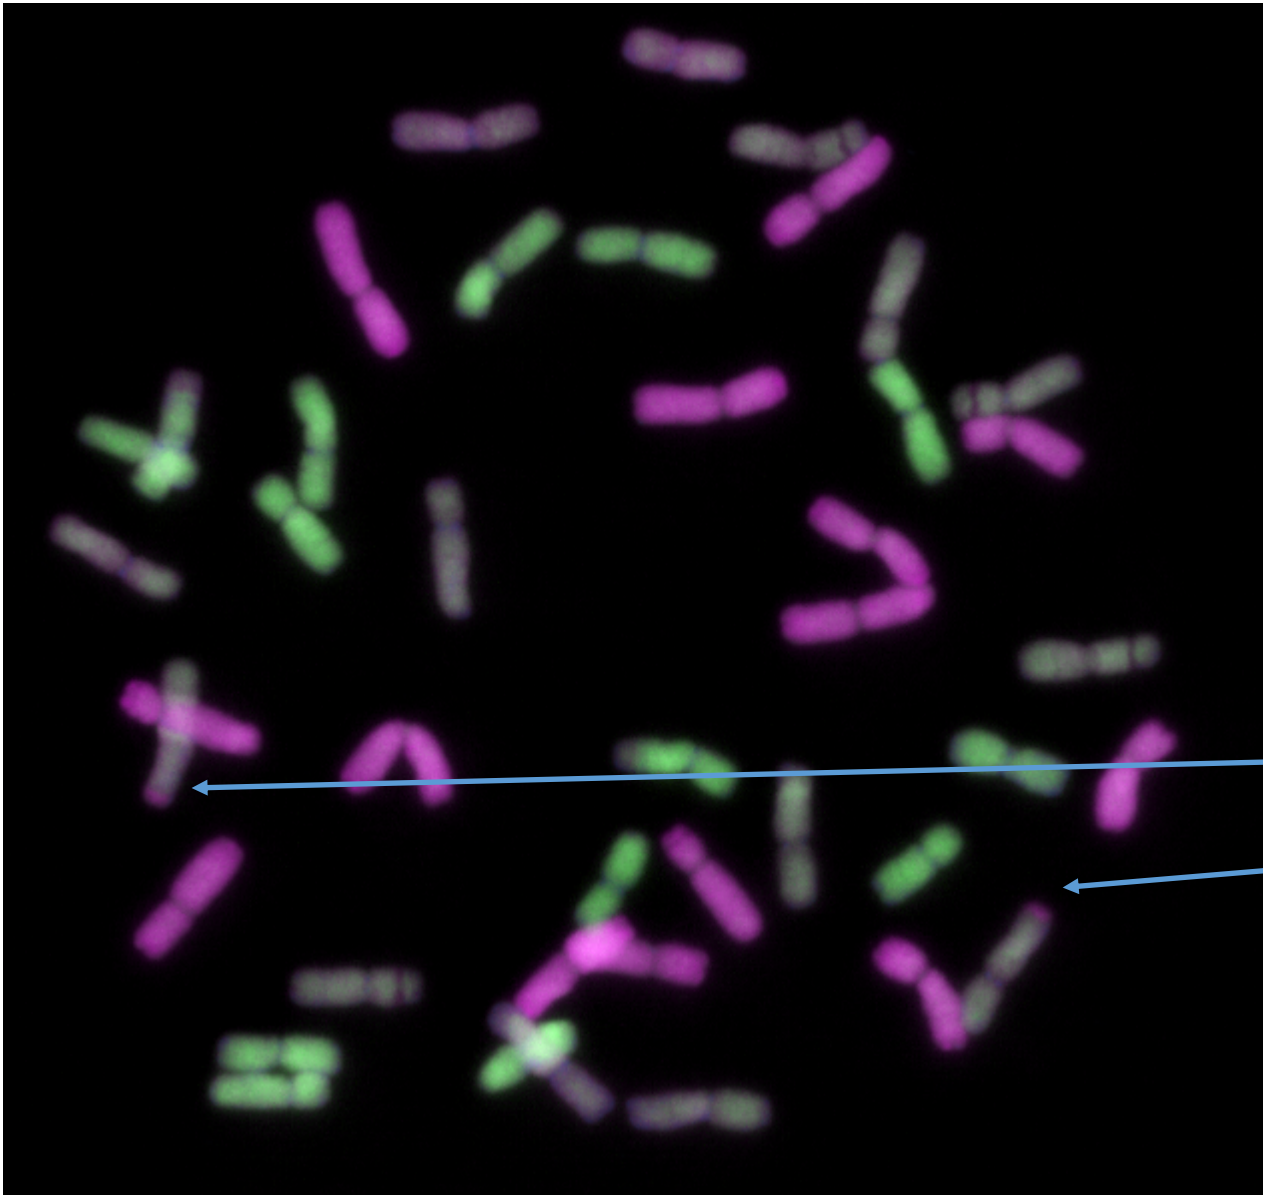

But has *Th. bessarabicum*  
related chromatin at the end  
of group 7B (small  
introgression)

## EC 787012

Azaziah x *Thinopyrum bessarabicum*

$n = 43$

**Pink** = *Th. bessarabicum*

**Green** = A genome

**Grey** = B genome

Extra B chromosome in all  
spreads

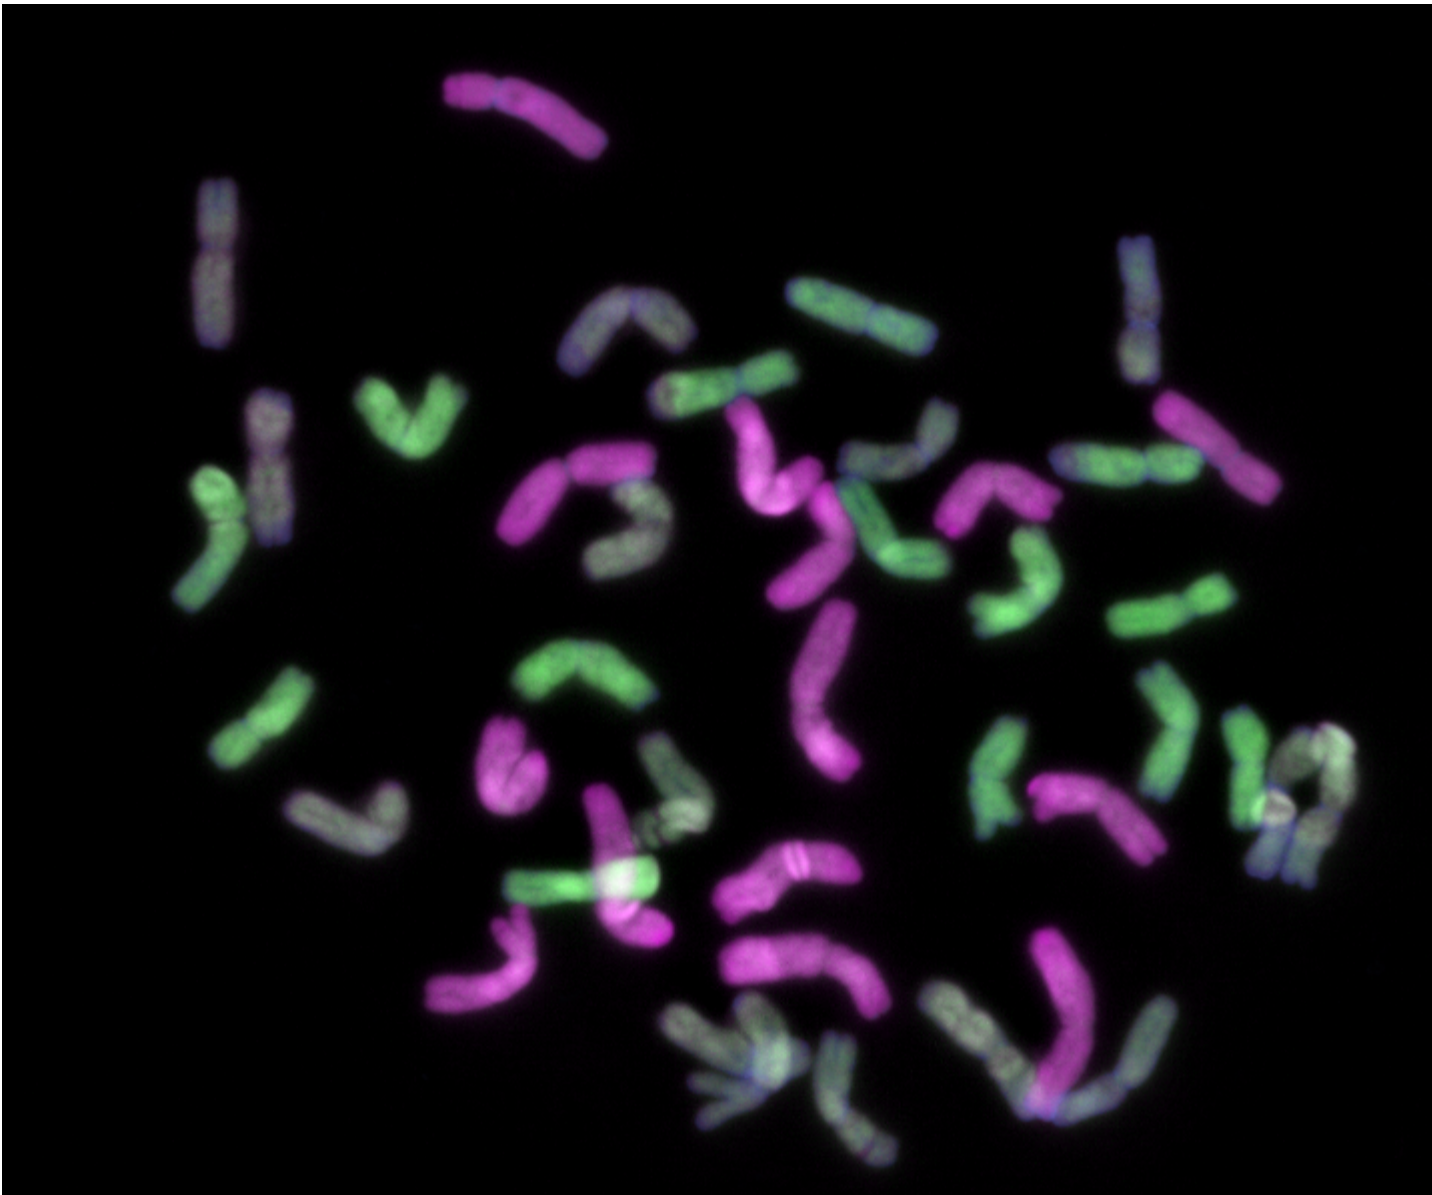

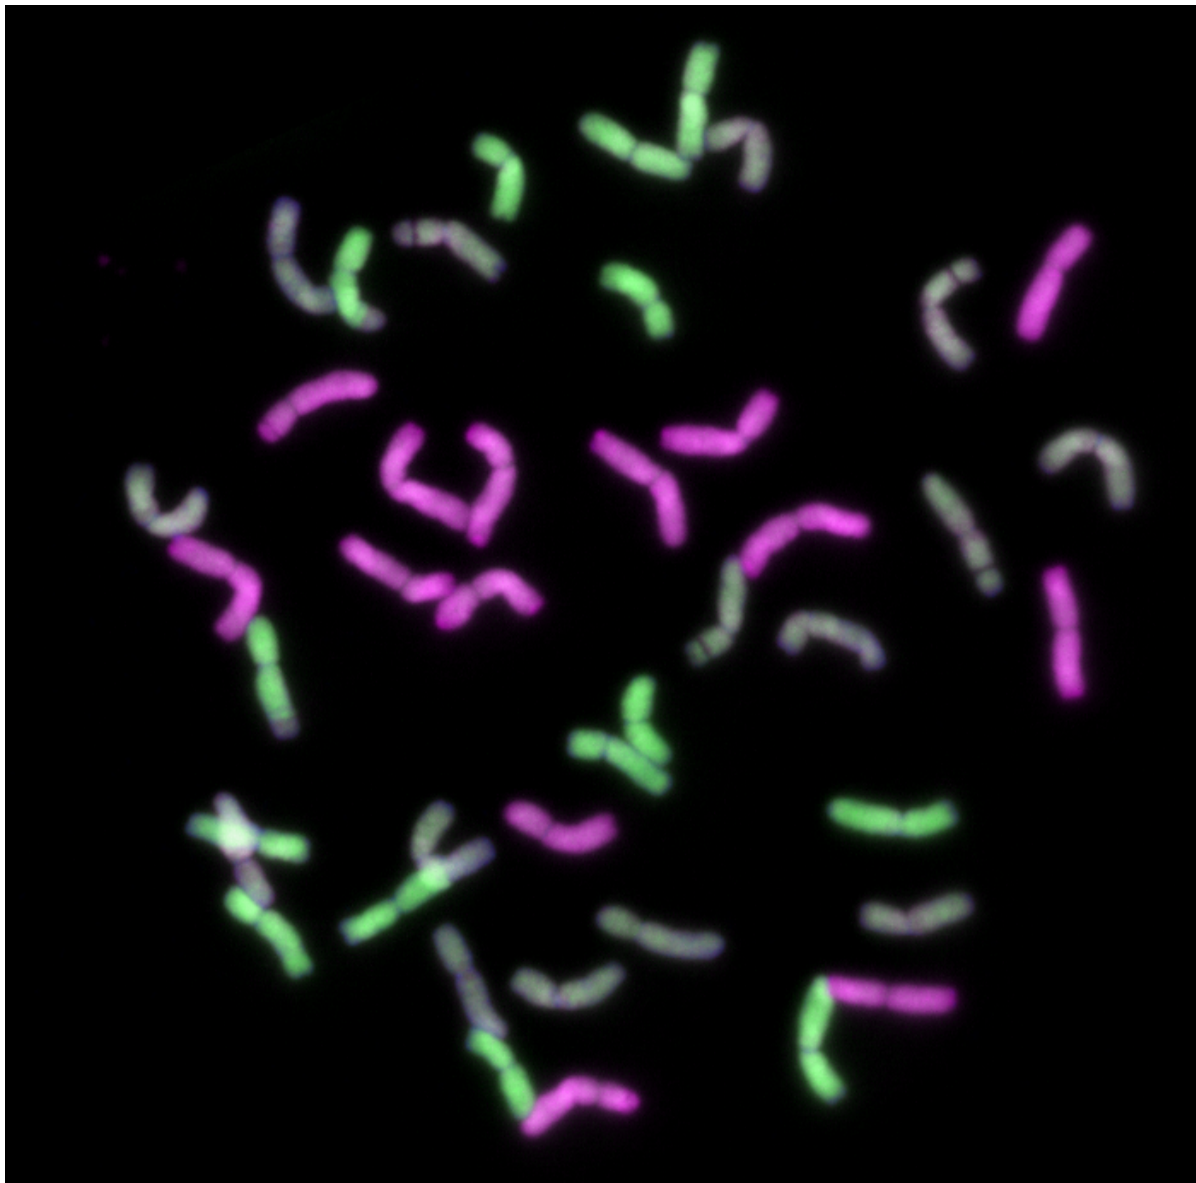

**EC 787013**

**Stewart x *Thinopyrum bessarabicum***

**Chromosome no (n) = 43**

**Pink** = *Th. bessarabicum*

**Green** = A genome

**Grey** = B genome

Extra B chromosome in all spreads

**Supplementary Material Figure S1.** Genomic in situ hybridization (GISH) images of amphidiploids
